# Supplementary material
Source: publisher figshare collection journal article supplement (https://frontiersin.figshare.com/ndownloader/files/25193513)
Supplement: Supplementary file 1 [file 25193513]

Supplementary Material

**Supplement S1.** Output from simultaneous autoregressive (SAR) models. The independent variable was percent vacancy at the block group scale. The dependent variables were tree canopy cover, normalized difference vegetation index (NDVI), and the percent of residential parcels with overgrown lawn and/or dumping.

**Tree canopy cover**

Model: spatial lag with quadratic term

| **Coefficients** | **Estimate** | **Std Error** | **z value** | **Pr(>|z|)** |
| --- | --- | --- | --- | --- |
| (Intercept) | 0.0819 | 0.0162 | 5.0642 | 0.0000 |
| Vacancy % | -0.2161 | 0.0912 | -2.3685 | 0.0179 |
| Vacancy %2 | 0.3844 | 0.2020 | 1.9028 | 0.0571 |

| **Impacts** | **Direct** | **Indirect** | **Total** |
| --- | --- | --- | --- |
| Vacancy % | -0.2643 | -0.7789 | -1.0432 |
| Vacancy %2 | 0.4701 | 1.3856 | 1.8558 |

Nagelkerke pseudo-R-squared: 0.65298 Number of observations: 296

AIC: -726.39, (AIC for lm: -500.49)

**NDVI**

Model: spatial lag with quadratic term

| **Coefficients** | **Estimate** | **Std Error** | **z value** | **Pr(>|z|)** |
| --- | --- | --- | --- | --- |
| (Intercept) | -0.0064 | 0.0046 | -1.3905 | 0.1644 |
| Vacancy % | -0.1341 | 0.0500 | -2.6845 | 0.0073 |
| Vacancy %2 | 0.3948 | 0.1132 | 3.4873 | 0.0005 |

| **Impacts** | **Direct** | **Indirect** | **Total** |
| --- | --- | --- | --- |
| Vacancy % | -0.1756 | -0.7497 | -0.9253 |
| Vacancy %2 | 0.5170 | 2.2073 | 2.7243 |

Nagelkerke pseudo-R-squared: 0.65735 Number of observations: 297

AIC: -1059.6, (AIC for lm: -802.8)

**Overgrown lawn and/or dumping**

Model: spatial error with quadratic term

| **Coefficients** | **Estimate** | **Std Error** | **z value** | **Pr(>|z|)** |
| --- | --- | --- | --- | --- |
| (Intercept) | 0.0101 | 0.0086 | 1.1795 | 0.2382 |
| Vacancy % | 0.1855 | 0.0546 | 3.4004 | 0.0007 |
| Vacancy %2 | 0.1816 | 0.1046 | 1.7358 | 0.0826 |

Nagelkerke pseudo-R-squared: 0.73002 Number of observations: 297

AIC: -1243.7, (AIC for lm: -1085.8)
